# Supplementary material for: Still’s Disease Mortality Trends in France, 1979–2016: A Multiple-Cause-of-Death Study
Source: MDPI journal article supplement (doi:10.3390/jcm10194544), 2021-09-30
Supplement: s1 [file s1]

# Supplementary material

related to: **Still's disease mortality trends in France, 1979-2016: a multiple-cause-of-death study**

by: Caroline Borciuch<sup>1</sup>, Mathieu Fauvernier<sup>2</sup>, Mathieu Gerfaud-Valentin<sup>1</sup>, Pascal Sève<sup>1,3</sup>, and Yvan Jamilloux<sup>1,4,5,\*</sup>

**Figure S1.** Distribution of deaths according to age in individuals aged under 35. The distribution of systemic-onset juvenile idiopathic arthritis (SJIA)-related deaths (black bars) and that in the general population (white bars) according to age is presented.

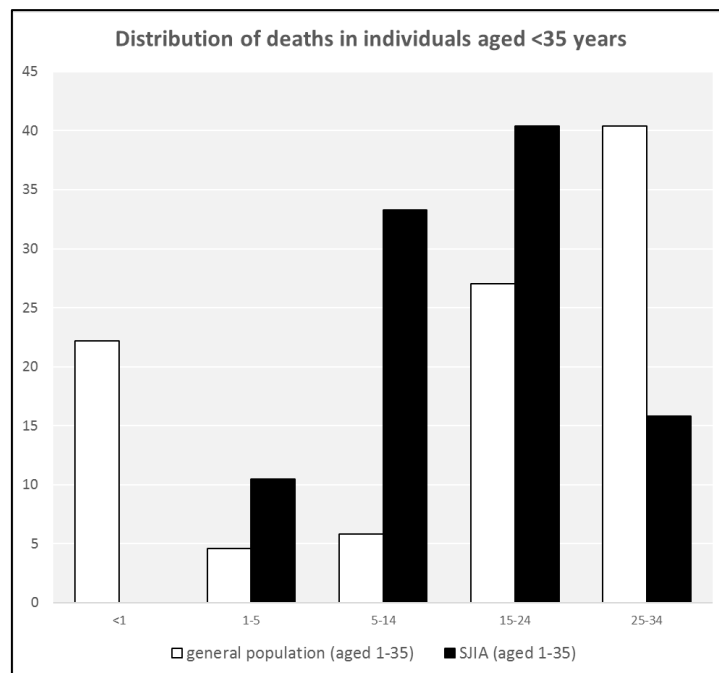

**Table S1.** Second non-underlying causes of death when SD was listed as the underlying cause of death, for the period 1979-2016.

|                                      | <b>Men</b><br>n=67 | <b>Women</b><br>n=87 | <b>Total</b><br>n=154 |
|--------------------------------------|--------------------|----------------------|-----------------------|
| Infections                           | 1 ( 1.5%)          | 1 ( 1.1%)            | 2 ( 1.3%)             |
| Cardiovascular diseases              | 3 ( 4.5%)          | 3 ( 3.4%)            | 6 ( 3.9%)             |
| Gastrointestinal diseases            | 0 (0)              | 0 (0)                | 6 (0)                 |
| Respiratory diseases                 | 2 ( 3.0%)          | 1 ( 1.1%)            | 3 ( 1.9%)             |
| Blood disorders                      | 0 ( 0.0%)          | 1 ( 1.1%)            | 1 ( 0.6%)             |
| Solid malignant neoplasms            | 2 ( 3.0%)          | 1 ( 1.1%)            | 3 ( 1.9%)             |
| Unclassified above                   | 12 (17.9%)         | 10 (11.5%)           | 22 (14.3%)            |
| No 2 <sup>nd</sup> NUCD notification | 59 (88.1%)         | 80 (92.0%)           | 139 (90.3%)           |
